# Supplementary material
Source: PubMed Central journal article supplement (PMC8973172)
Supplement: boe-13-3-1374-s001.pdf [file boe-13-3-1374-s001.pdf]

## Real-time OCT image denoising using a self-fusion neural network: supplement

**JOSE J. RICO-JIMENEZ,<sup>1</sup>**  **DEWEI HU,<sup>2</sup>** **ERIC M. TANG,<sup>1</sup>**  **IPEK OGUZ,<sup>2</sup>** **AND YUANKAI K. TAO<sup>1,\*</sup>**

<sup>1</sup>*Department of Biomedical Engineering, Vanderbilt University, Nashville, TN 37232, USA*

<sup>2</sup>*Department of Electrical Engineering and Computer Science, Vanderbilt University, Nashville, TN 37235 USA, USA*

\*[yuankai.tao@vanderbilt.edu](mailto:yuankai.tao@vanderbilt.edu)

---

This supplement published with Optica Publishing Group on 14 February 2022 by The Authors under the terms of the [Creative Commons Attribution 4.0 License](https://creativecommons.org/licenses/by/4.0/) in the format provided by the authors and unedited. Further distribution of this work must maintain attribution to the author(s) and the published article's title, journal citation, and DOI.

Supplement DOI: <https://doi.org/10.6084/m9.figshare.19137020>

Parent Article DOI: <https://doi.org/10.1364/BOE.451029>

**Supplemental material**

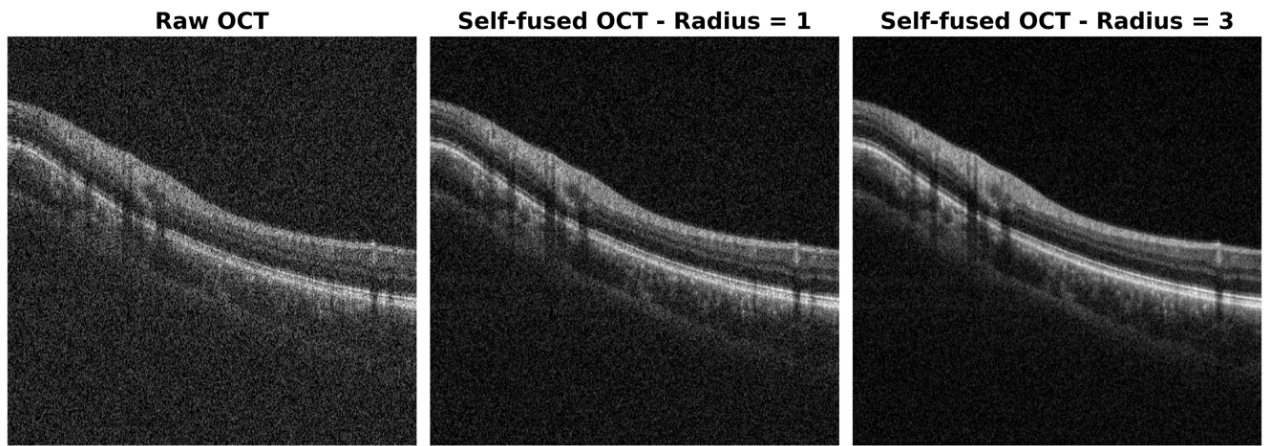

**Supplemental figure 1.** OCT self-fused images using a radius of 1 and 3.
